# Supplementary material for: Tumor Immunotherapy Using Gene-Modified Human Mesenchymal Stem Cells Loaded into Synthetic Extracellular Matrix Scaffolds
Source: PubMed Central journal article supplement (PMC2729675; doi:10.1634/stemcells.2008-0831), 2009-03

**A**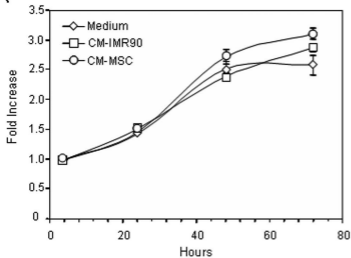**B**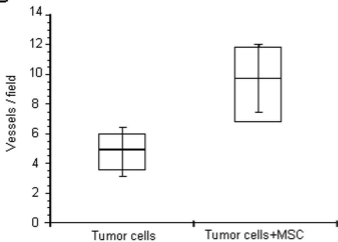

Supplement: stem0027-0753-SD2.pdf [file stem0027-0753-SD2.pdf]
